# Supplementary material for: The Antiviral Effect of High-Molecular Weight Poly-Gamma-Glutamate against Newcastle Disease Virus on Murine Macrophage Cells
Source: Hindawi journal article supplement (doi:10.1155/2014/301386), 2014-01-01

# Supplemental Figure 1

(A)

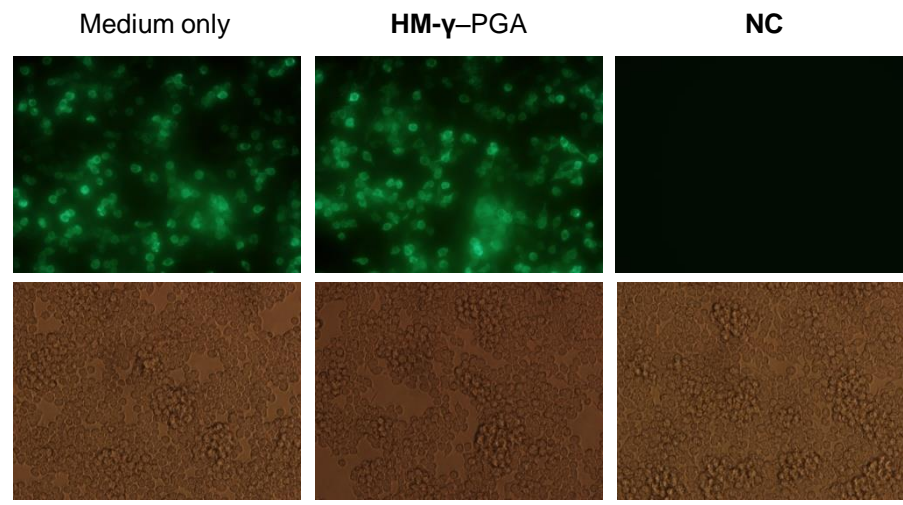

(B)

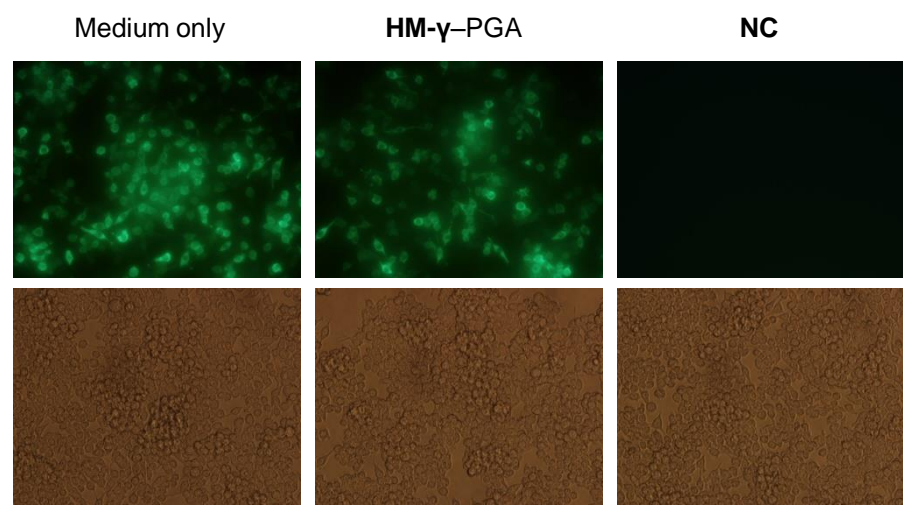

Supplement: f1 [file 301386.f1.pdf]
